# Supplementary material for: The dietary inflammatory index and new-onset hypertension in Chinese adults: a nationwide cohort study
Source: Royal Society of Chemistry journal article supplement (doi:10.1039/d3fo03767c), 2023-01-01
Supplement: d3fo03767c1.pdf [file d3fo03767c1.pdf]

Supplementary Figure 1. Flow chart of study participants.

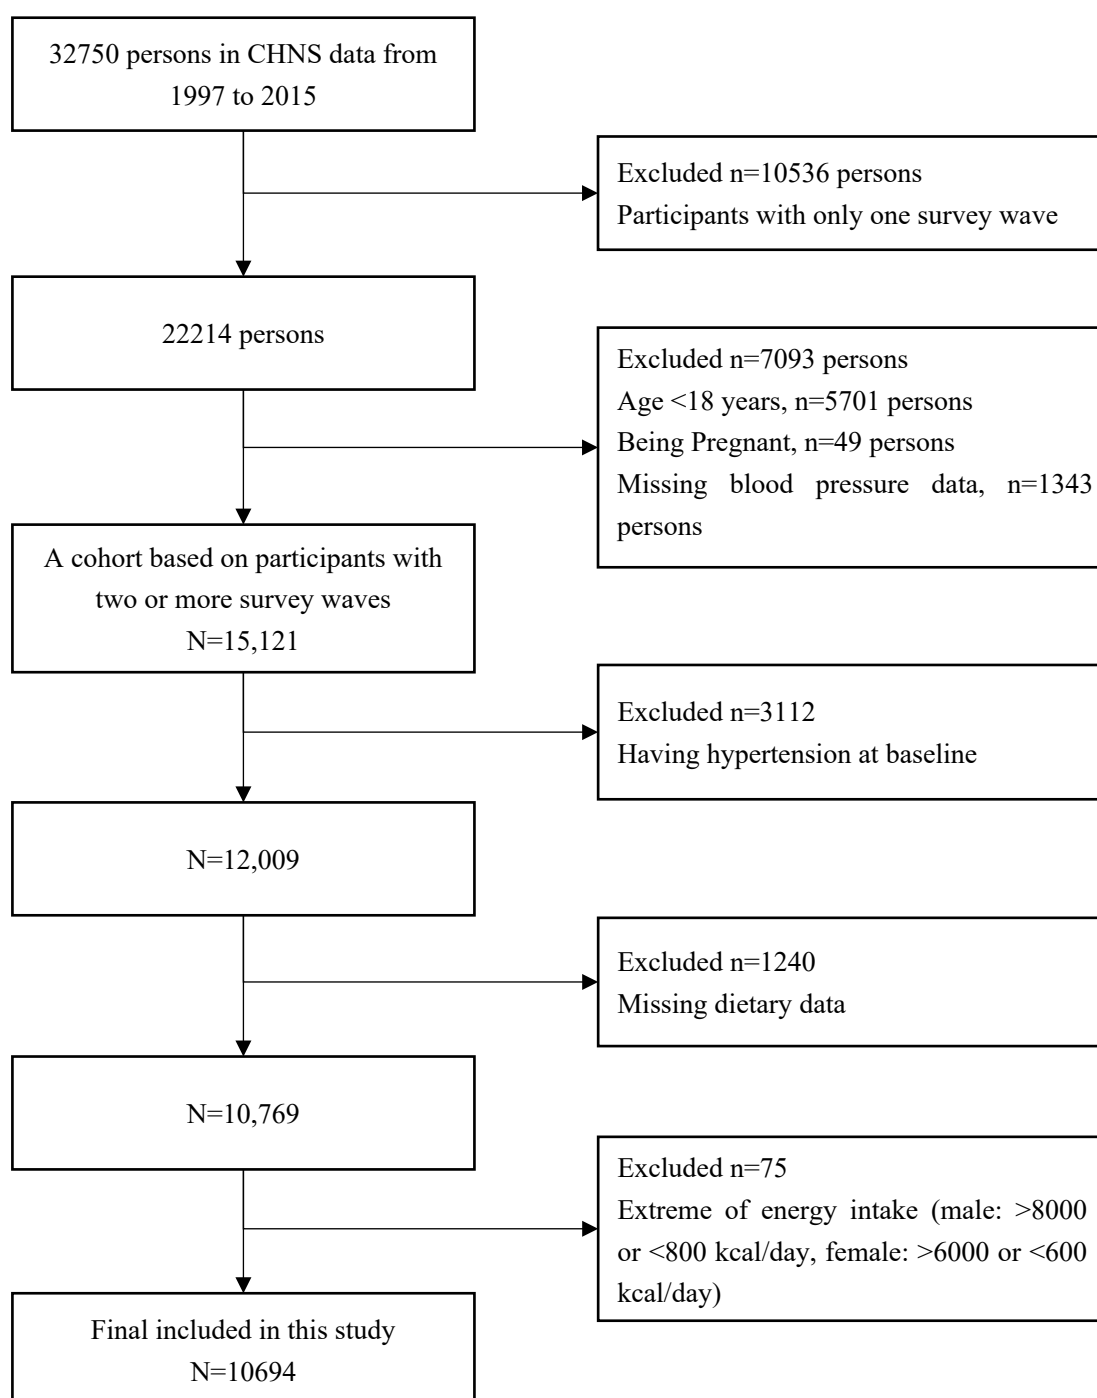

Supplementary Table 1. Interaction between DII and covariate on new-onset hypertension.

| Covariate                    | DII    | HR (95%CI)       | <i>P</i>         | RERI               | AP                 | S                |
|------------------------------|--------|------------------|------------------|--------------------|--------------------|------------------|
| <b>Gender</b>                |        |                  |                  |                    |                    |                  |
| Male                         | Higher | Ref              |                  | 0.11 (-0.10,0.33)  | 0.21 (-0.18,0.60)  | 0.80 (0.54,1.18) |
| Female                       | Higher | 0.89 (0.76,1.04) | 0.149            |                    |                    |                  |
| Male                         | Lower  | 1.00 (0.87,1.13) | 0.918            |                    |                    |                  |
| Female                       | Lower  | 0.74 (0.63,0.86) | <b>&lt;0.001</b> |                    |                    |                  |
| <b>Age, years</b>            |        |                  |                  |                    |                    |                  |
| ≥45 years                    | Higher | Ref              |                  | -0.01 (-0.58,0.57) | -0.01 (-0.21,0.20) | 1.00 (0.72,1.38) |
| <45 years                    | Higher | 0.47 (0.41,0.53) | <b>&lt;0.001</b> |                    |                    |                  |
| ≥45 years                    | Lower  | 0.92 (0.81,1.06) | 0.248            |                    |                    |                  |
| <45 years                    | Lower  | 0.41 (0.36,0.47) | <b>&lt;0.001</b> |                    |                    |                  |
| <b>SBP, mmHg</b>             |        |                  |                  |                    |                    |                  |
| ≥130 mmHg                    | Higher | Ref              |                  | -0.06 (-0.54,0.42) | -0.02 (-0.20,0.16) | 0.96 (0.73,1.27) |
| <130 mmHg                    | Higher | 0.75 (0.61,0.9)  | <b>0.004</b>     |                    |                    |                  |
| ≥130 mmHg                    | Lower  | 1.05 (0.80,1.38) | 0.723            |                    |                    |                  |
| <130 mmHg                    | Lower  | 0.66 (0.54,0.81) | <b>&lt;0.001</b> |                    |                    |                  |
| <b>DBP, mmHg</b>             |        |                  |                  |                    |                    |                  |
| ≥80 mmHg                     | Higher | Ref              |                  | -0.03 (-0.38,0.32) | -0.01 (-0.18,0.15) | 0.97 (0.72,1.32) |
| <80 mmHg                     | Higher | 0.66 (0.57,0.76) | <b>&lt;0.001</b> |                    |                    |                  |
| ≥80 mmHg                     | Lower  | 0.96 (0.82,1.11) | 0.562            |                    |                    |                  |
| <80 mmHg                     | Lower  | 0.59 (0.51,0.67) | <b>&lt;0.001</b> |                    |                    |                  |
| <b>BMI, kg/m<sup>2</sup></b> |        |                  |                  |                    |                    |                  |
| ≥24 kg/m <sup>2</sup>        | Higher | Ref              |                  | -0.02 (-0.34,0.30) | -0.01 (-0.19,0.17) | 0.98 (0.66,1.44) |
| <24 kg/m <sup>2</sup>        | Higher | 0.67 (0.58,0.79) | <b>&lt;0.001</b> |                    |                    |                  |
| ≥24 kg/m <sup>2</sup>        | Lower  | 0.98 (0.83,1.14) | 0.757            |                    |                    |                  |
| <24 kg/m <sup>2</sup>        | Lower  | 0.58 (0.50,0.68) | <b>&lt;0.001</b> |                    |                    |                  |
| <b>Abdominal obesity</b>     |        |                  |                  |                    |                    |                  |
| Yes                          | Higher | Ref              |                  | -0.01 (-0.30,0.29) | -0.01 (-0.18,0.15) | 0.99 (0.53,1.86) |
| No                           | Higher | 0.99 (0.86,1.16) | 0.959            |                    |                    |                  |
| Yes                          | Lower  | 0.99 (0.85,1.17) | 0.965            |                    |                    |                  |
| No                           | Lower  | 0.86 (0.74,1.01) | 0.058            |                    |                    |                  |

HR: hazard ratio; RERI: Relative Excess Risk of Interaction, AP: Attributable Proportion, S:

Synergy

Index

Supplementary Figure 2. The relationship of DII with risk of new-onset hypertension in various subgroups.

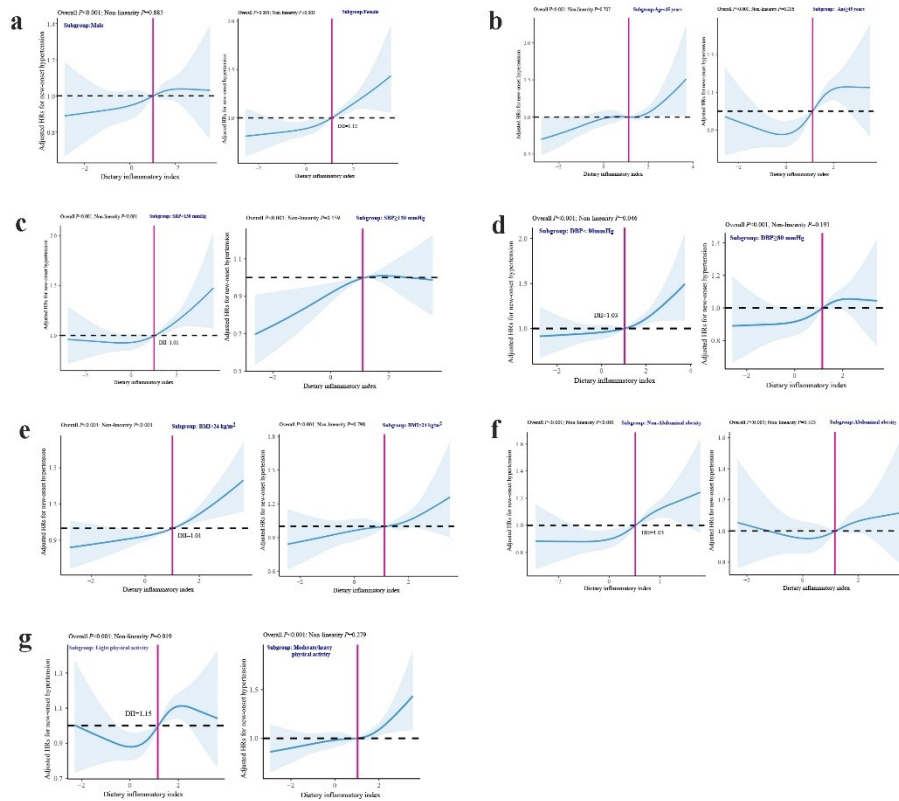

**a:** grouping by gender; **b:** grouping by age; **c:** grouping by the level of baseline systolic blood pressure; **d:** grouping by the level of baseline diastolic blood

pressure; **e**: grouping by the level of body mass index; **f**: grouping by abdominal obesity; **g**: grouping by physical activity levels. Multivariable-adjusted HRs (blue solid lines) and 95% CIs (blue shadow) for risk of new-onset hypertension according to DII score among whole population. The median intakes were set as references (black dotted line) (HR=1.00). The solid pink line represents the line where the point corresponding to the value of the DII in the curve is located when HR=0.

Supplementary Table 2. HRs (95% CI) of new-onset hypertension according to the quartiles of DII<sup>1</sup> after excluding the individuals with diabetes at baseline.

| □                        | Quartiles of DII <sup>2</sup> |                    |                    |                  | <i>P</i> for trend | Continuous DII   |
|--------------------------|-------------------------------|--------------------|--------------------|------------------|--------------------|------------------|
|                          | Q1 (<0.28)                    | Q2 (0.28 to <1.08) | Q3 (1.08 to <1.85) | Q4 (≥1.85)       |                    |                  |
| Case                     | 841                           | 883                | 970                | 924              |                    |                  |
| Person-years             | 22830                         | 23436              | 22947              | 20893            |                    |                  |
| Case/1000 person-years   | 36.8                          | 37.7               | 42.3               | 44.2             |                    |                  |
| Crude Model <sup>a</sup> | 1(ref)                        | 1.04 (0.95,1.14)   | 1.17 (1.07,1.28)   | 1.23 (1.13,1.35) | 0.001              | 1.08 (1.05,1.11) |
| Model 1 <sup>b</sup>     | 1(ref)                        | 1.00 (0.91,1.08)   | 1.11 (1.01,1.21)   | 1.16 (1.06,1.28) | 0.002              | 1.06 (1.03,1.09) |
| Model 2 <sup>c</sup>     | 1(ref)                        | 1.00 (0.91,1.10)   | 1.10 (0.99,1.20)   | 1.17 (1.06,1.28) | 0.001              | 1.06 (1.03,1.09) |
| Model 3 <sup>d</sup>     | 1(ref)                        | 1.02 (0.93,1.13)   | 1.06 (0.97,1.17)   | 1.14 (1.03,1.25) | 0.046              | 1.05 (1.02,1.08) |
| Model 4 <sup>e</sup>     | 1(ref)                        | 1.02 (0.93,1.13)   | 1.06 (0.97,1.17)   | 1.14 (1.04,1.26) | 0.042              | 1.05 (1.02,1.08) |

<sup>1</sup>DII: dietary inflammatory index.

<sup>2</sup>Q = quartile, Q1 denotes the first quartile of DII, i.e., P25, indicates participants having the lowest DII values, the least pro-inflammatory level; Q2 denotes the second quartile, i.e., P50; Q3 denotes the third quartile, i.e., P75 and Q4 the highest quartile of DII. the most pro- inflammatory level

<sup>a</sup>Crude Model: not adjusted.

<sup>b</sup>Model 1 adjusted for age, gender.

<sup>c</sup>Model 2 adjusted for age, gender, residence, education, physical activity level, smoking, alcohol drinking.

<sup>d</sup>Model 3 adjusted for age, gender, residence, education, physical activity level, smoking, alcohol drinking, body mass index, waist circumference, systolic blood pressure, diastolic blood pressure.

<sup>c</sup>Model 4 adjusted for age, gender, residence, education, physical activity level, smoking, alcohol drinking, body mass index, waist circumference, systolic blood pressure, diastolic blood pressure, sodium to potassium intake ratio, as well as energy, fat, protein, carbohydrate intake.

Supplementary Table 3. The relationship of DII<sup>1</sup> with risk of different components of new-onset hypertension.

| □                                       | Quartiles of DII <sup>2</sup> |                    |                    |                   | <i>P</i> for trend | Continuous DII   |
|-----------------------------------------|-------------------------------|--------------------|--------------------|-------------------|--------------------|------------------|
|                                         | Q1 (<0.28)                    | Q2 (0.28 to <1.08) | Q3 (1.08 to <1.85) | Q4 (≥1.85)        |                    |                  |
| <b>Physician-diagnosed hypertension</b> |                               |                    |                    |                   |                    |                  |
| Case (incidence rate <sup>†</sup> )     | 81 (4.6)                      | 97 (5.7)           | 78 (4.9)           | 105 (7.4)         |                    |                  |
| Crude Model <sup>a</sup>                | 1 (Ref)                       | 1.05 (0.86,1.27)   | 1.01 (0.83,1.23)   | 1.11 (0.91,1.35)  | 0.745              | 1.06 (1.00,1.13) |
| Model 1 <sup>b</sup>                    | 1 (Ref)                       | 1.04 (0.86,1.26)   | 0.98 (0.81,1.20)   | 1.08 (0.89,1.32)  | 0.788              | 1.05 (0.99,1.12) |
| Model 2 <sup>c</sup>                    | 1 (Ref)                       | 1.06 (0.87,1.29)   | 0.97 (0.79,1.18)   | 1.11 (0.91,1.26)  | 0.555              | 1.05 (0.99,1.12) |
| Model 3 <sup>d</sup>                    | 1 (Ref)                       | 1.11 (0.90,1.35)   | 0.96 (0.78,1.18)   | 1.12 (0.91,1.38)  | 0.354              | 1.05 (0.98,1.12) |
| Model 4 <sup>e</sup>                    | 1 (Ref)                       | 1.08 (0.88,1.34)   | 0.94 (0.76,1.16)   | 1.09 (0.89,1.35)  | 0.497              | 1.04 (0.97,1.11) |
| <b>SBP ≥140 and/or DBP ≥90 mmHg</b>     |                               |                    |                    |                   |                    |                  |
| Case (incidence rate <sup>†</sup> )     | 688 (38.8)                    | 722 (42.5)         | 728 (45.5)         | 756 (53.0)        |                    |                  |
| Crude Model <sup>a</sup>                | 1 (Ref)                       | 0.98 (0.89,1.080)  | 1.09 (0.991,1.203) | 1.18 (1.07,1.30)  | 0.001              | 1.06 (1.03,1.09) |
| Model 1 <sup>b</sup>                    | 1 (Ref)                       | 0.99 (0.90,1.0911) | 1.09 (0.99,1.19)   | 1.18 (1.087,1.30) | 0.001              | 1.06 (1.03,1.09) |
| Model 2 <sup>c</sup>                    | 1 (Ref)                       | 0.98 (0.89,1.08)   | 1.08 (0.98,1.19)   | 1.18 (1.07,1.30)  | 0.001              | 1.06 (1.03,1.09) |
| Model 3 <sup>d</sup>                    | 1 (Ref)                       | 1.01 (0.92,1.12)   | 1.05 (0.95,1.16)   | 1.15 (1.04,1.27)  | 0.023              | 1.04 (1.01,1.08) |
| Model 4 <sup>e</sup>                    | 1 (Ref)                       | 1.02 (0.92,1.12)   | 1.05 (0.95,1.16)   | 1.16 (1.04,1.28)  | 0.022              | 1.04 (1.01,1.08) |

<sup>1</sup>DII: dietary inflammatory index.

<sup>2</sup>Q = quartile, Q1 denotes the first quartile of DII, i.e., P25, indicates participants having the lowest DII values, the least pro-inflammatory level; Q2 denotes the second quartile, i.e., P50; Q3 denotes the third quartile, i.e., P75 and Q4 the highest quartile of DII. the most pro- inflammatory level

†Incidence rates per 1000 person years.

<sup>a</sup>Crude Model: not adjusted.

<sup>b</sup>Model 1 adjusted for age, gender.

<sup>c</sup>Model 2 adjusted for age, gender, residence, education, occupation, physical activity level, smoking, alcohol drinking.

<sup>d</sup>Model 3 adjusted for age, gender, residence, education, occupation, physical activity level, smoking, alcohol drinking, self-reported diabetes, body mass index, waist circumference, systolic blood pressure, diastolic blood pressure.

<sup>e</sup>Model 4 adjusted for age, gender, residence, education, occupation, physical activity level, smoking, alcohol drinking, self-reported diabetes, body mass index, waist circumference, systolic blood pressure, diastolic blood pressure, sodium to potassium intake ratio, as well as energy, fat, protein, carbohydrate intake.

Supplementary Figure 3. Illustrates the output model for the mediation effect of BMI. Path c represents the total effect between DII and hypertension. Path ab represents the indirect effect between DII and hypertension. Path a represents the relationship between DII, and BMI and path b shows the relationship between BMI and hypertension. Path c' represents the direct effect between DII and hypertension.

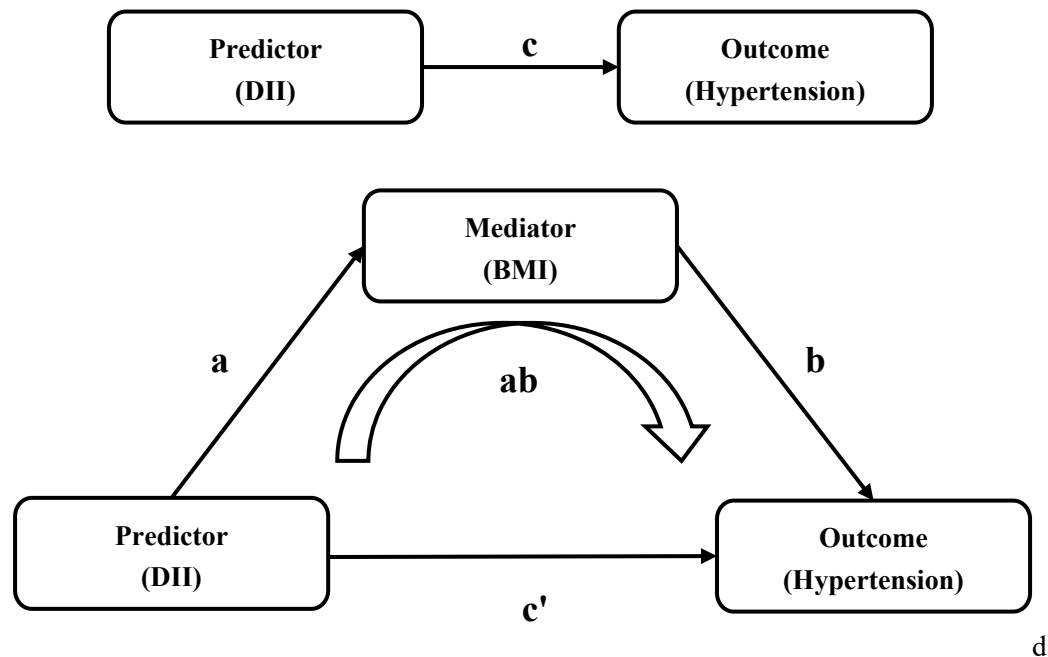

Supplementary Table 4. Mediation analysis of BMI on the relationship between DII and hypertension by

| Parameters              | Total                | Male                  | Female                |
|-------------------------|----------------------|-----------------------|-----------------------|
| Total effect c          | 0.040 (0.01,0.079)*  | -0.008 (-0.062,0.047) | 0.087 (0.031,0.143)*  |
| Indirect effect path ab | 0.005 (-0.001,0.011) | 0.009 (0.003,0.017)*  | -0.002 (-0.012,0.007) |
| path a                  | 0.051 (-0.010,1.111) | 0.129 (0.042,0.214)*  | -0.020 (-0.104,0.065) |
| path b                  | 0.091 (0.077,0.105)* | 0.072 (0.052,0.092)*  | 0.105 (0.087,0.124)*  |
| Direct effect path c'   | 0.036 (-0.003,0.075) | -0.017 (-0.072,0.038) | 0.090 (0.034,0.147)*  |

Adjusted for age, gender, residence, education, physical activity level, smoking, alcohol drinking, self-reported diabetes, baseline systolic blood pressure, baseline diastolic blood pressure, sodium to potassium intake ratio, as well as energy, fat, protein, carbohydrate intake.

\* $P < 0.05$ .



Supplementary Table 5. Dietary intakes of energy and energy-adjusted dietary intakes

(per 1000 kcal)

| Nutrients                          | Non-hypertension | New-onset hypertension | <i>P</i> |
|------------------------------------|------------------|------------------------|----------|
| Energy (kcal)                      | 2138.23±664.86   | 2264.54±656.55         | <0.001   |
| Carbohydrate (g/1000 kcal)         | 142.63±32.60     | 148.30±32.52           | <0.001   |
| Protein (g/1000 kcal)              | 30.78±7.05       | 32.41±8.03             | <0.001   |
| Fat (g/1000 kcal)                  | 30.58±13.49      | 32.75±13.57            | <0.001   |
| Cholesterol (mg/1000 kcal)         | 280.61±26.50     | 315.82±33.25           | 0.001    |
| MUFAs <sup>1</sup> (g/1000 kcal)   | 3.60±0.45        | 3.88±0.52              | 0.770    |
| PUFAs <sup>2</sup> (g/1000 kcal)   | 3.00±0.70        | 5.51±0.89              | <0.001   |
| Saturated fatty acid (g/1000 kcal) | 11.13±1.02       | 12.10±1.23             | 0.030    |
| Fiber (g/1000 kcal)                | 11.86±1.63       | 9.22±1.52              | 0.405    |
| Vitamin A (RAE/1000 kcal)          | 407.93±73.20     | 458.80±283.01          | 0.593    |
| Vitamin B1 (mg/1000 kcal)          | 0.41±0.16        | 0.42±0.15              | 0.898    |
| Vitamin B2 (mg/1000 kcal)          | 0.41±0.21        | 0.43±0.22              | 0.796    |
| Vitamin C (mg/1000 kcal)           | 50.26±36.38      | 47.33±32.23            | 0.020    |
| Alcohol (g/1000 kcal)              | 1.23±0.82        | 2.37±1.15              | 0.005    |

<sup>1</sup>MUFAs: monounsaturated fatty acids; <sup>2</sup>PUFAs: polyunsaturated fatty acids.
